# Supplementary material for: Overlap and Specificity in the Substrate Spectra of Human Monoamine Transporters and Organic Cation Transporters 1, 2, and 3
Source: MDPI journal article supplement (doi:10.3390/ijms222312816), 2021-11-26

Figure S1: Molecule Structures and Ratio Plots

Phenylethylamines I

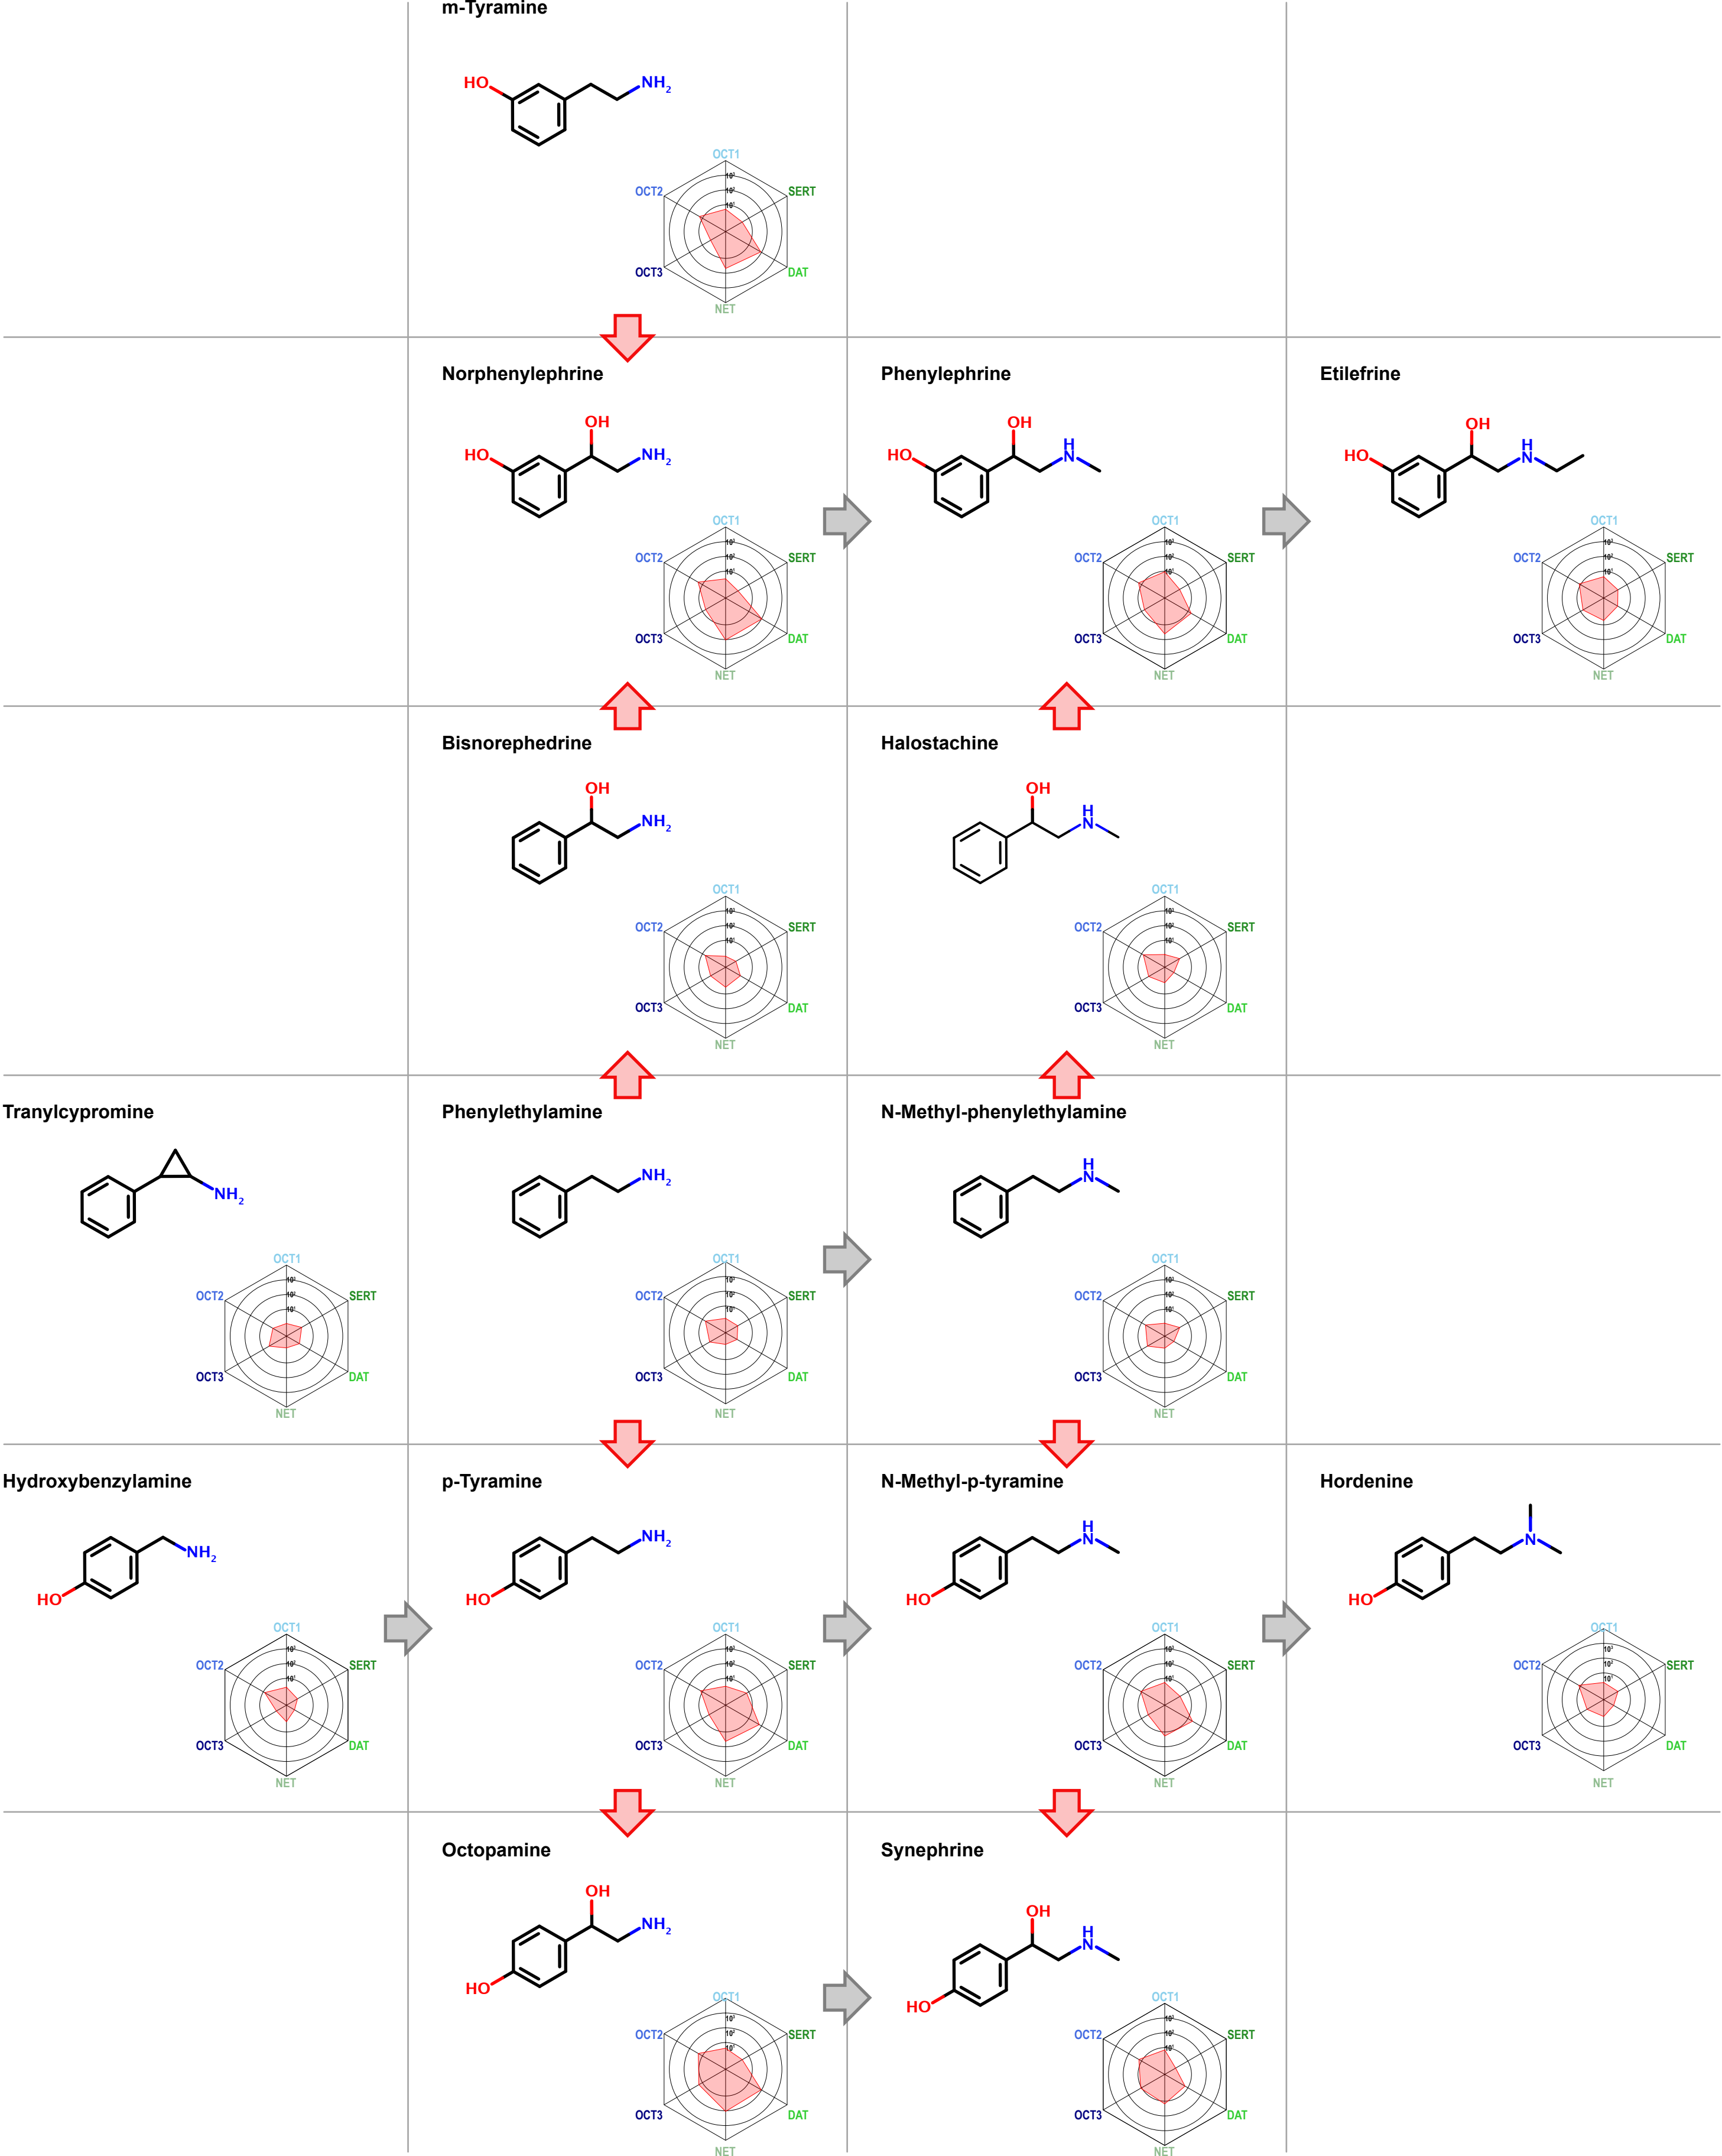

↓ hydroxylation  
→ methylation  
= constitutional isomers

Figure S1: Molecule Structures and Ratio Plots

Phenylethylamines II

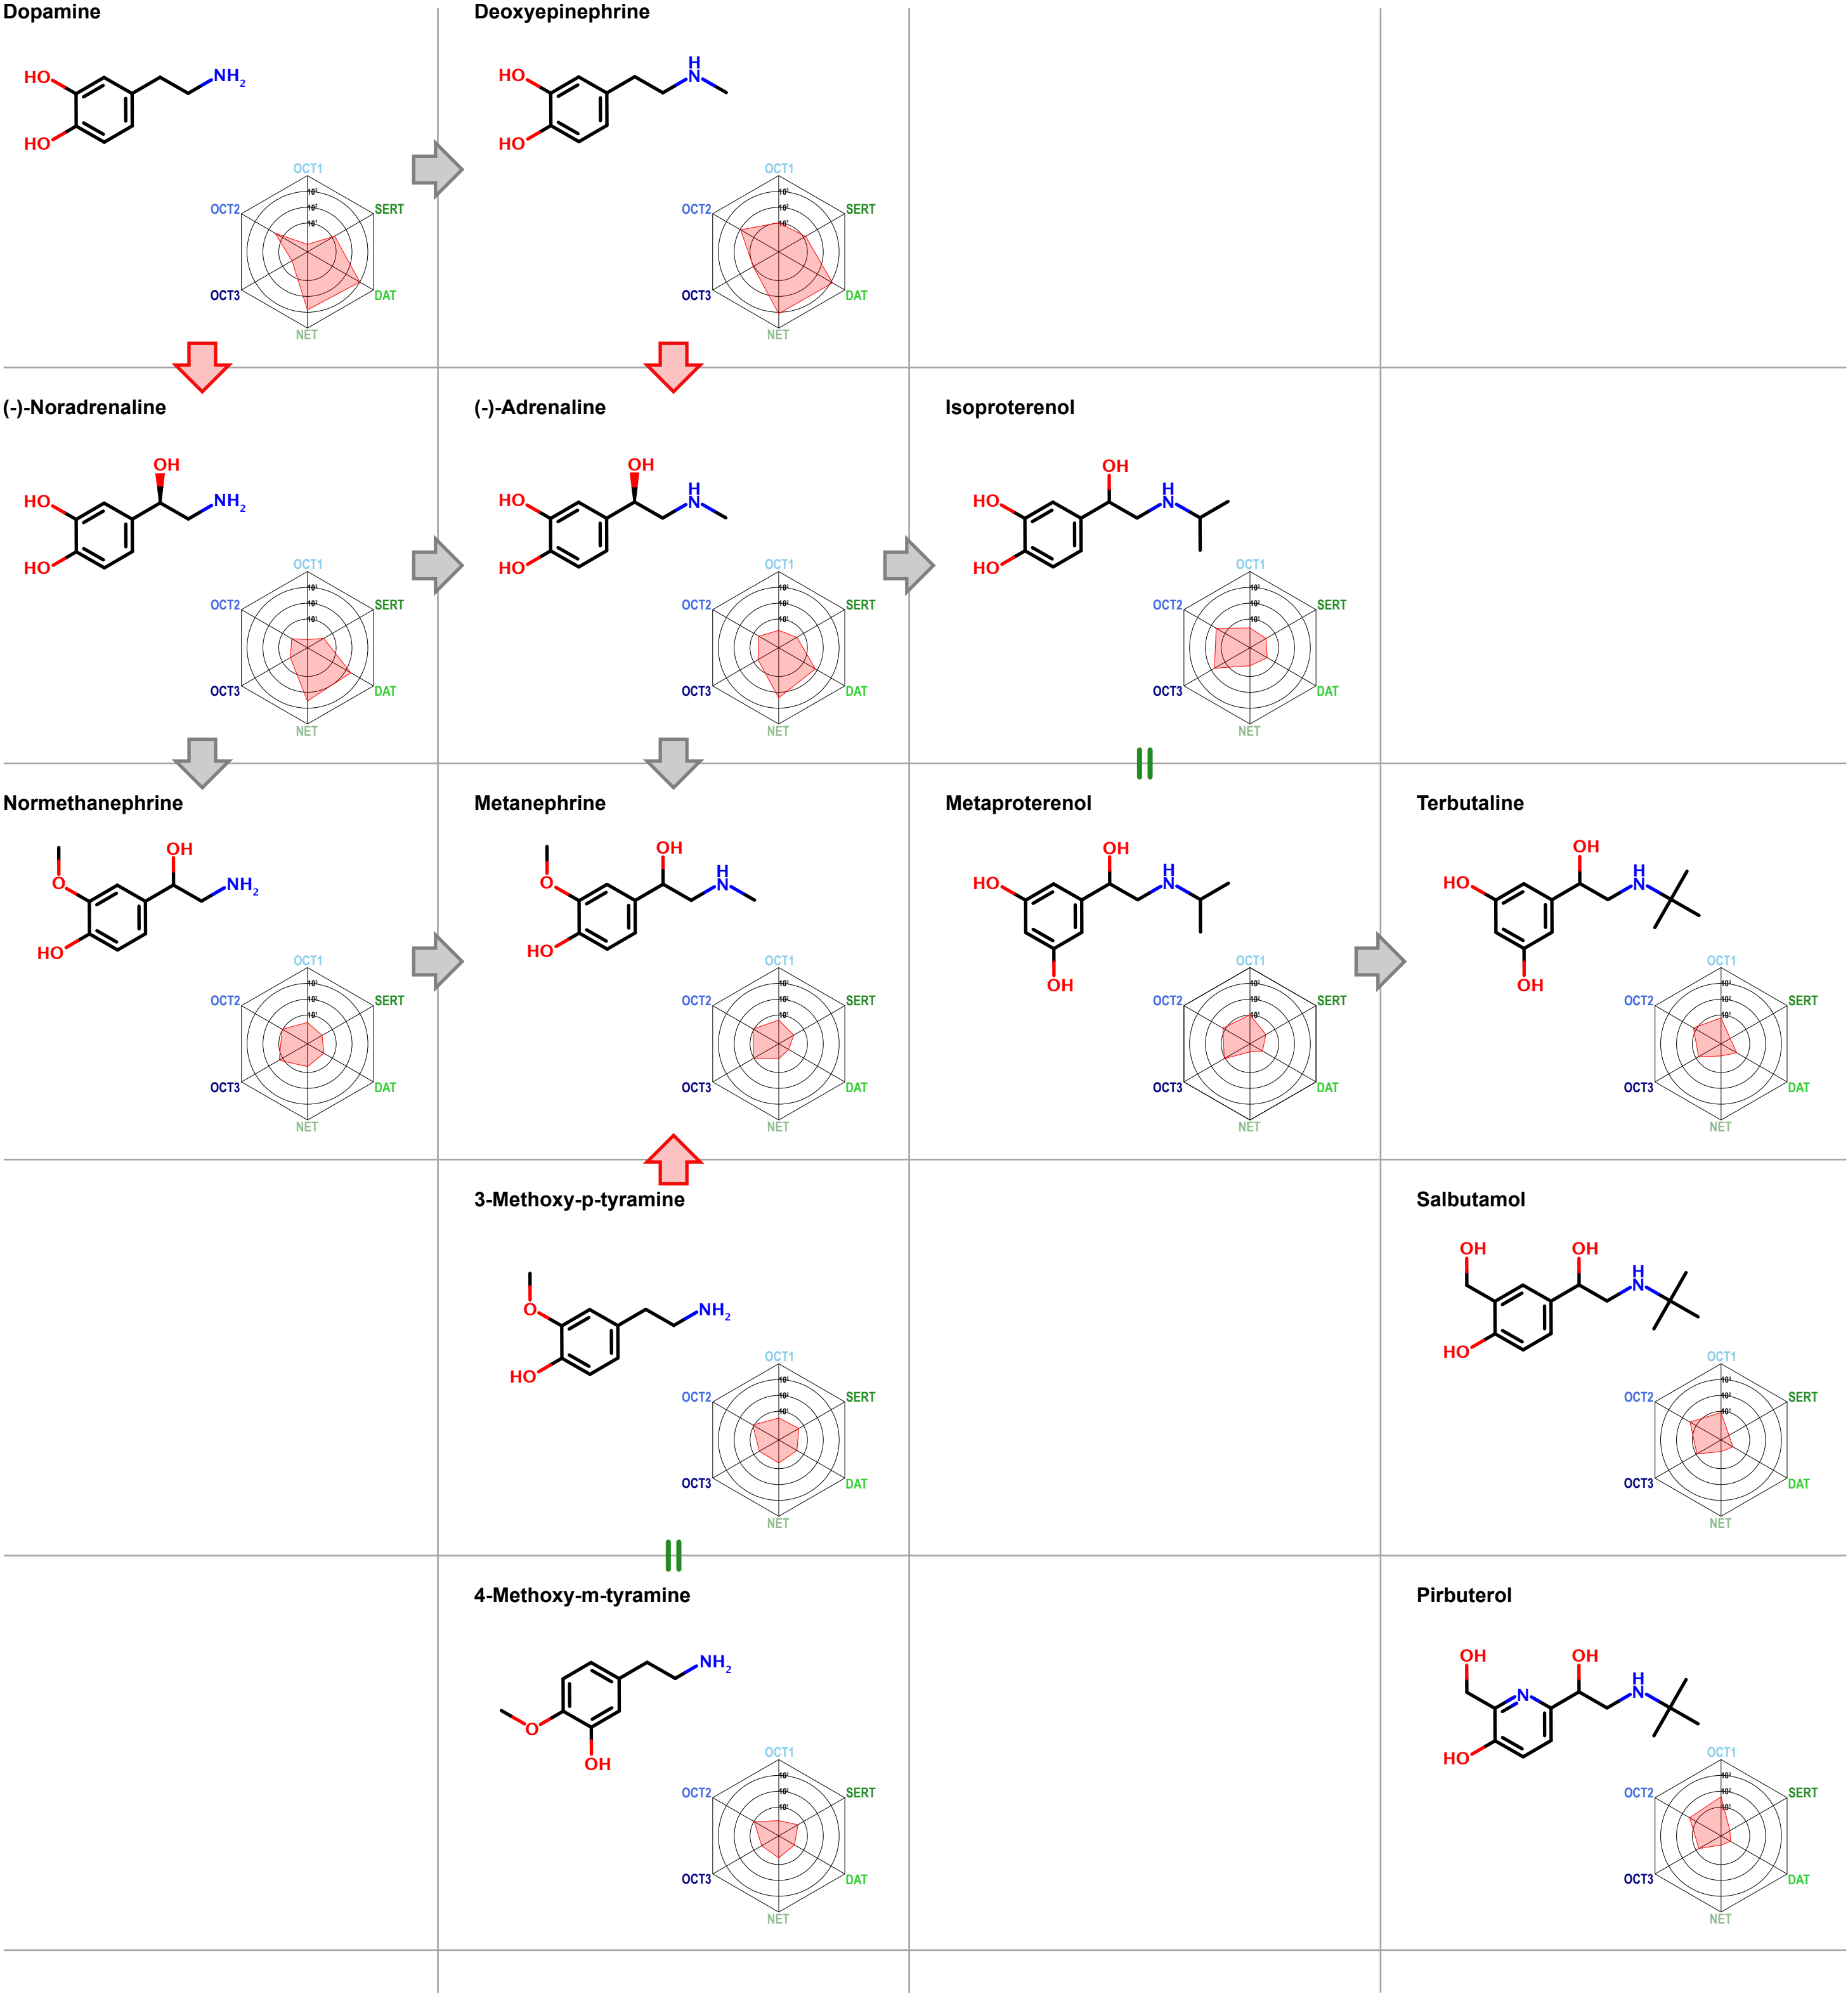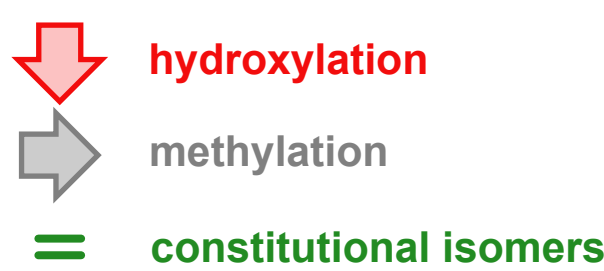

Figure S1: Molecule Structures and Ratio Plots

Indoles

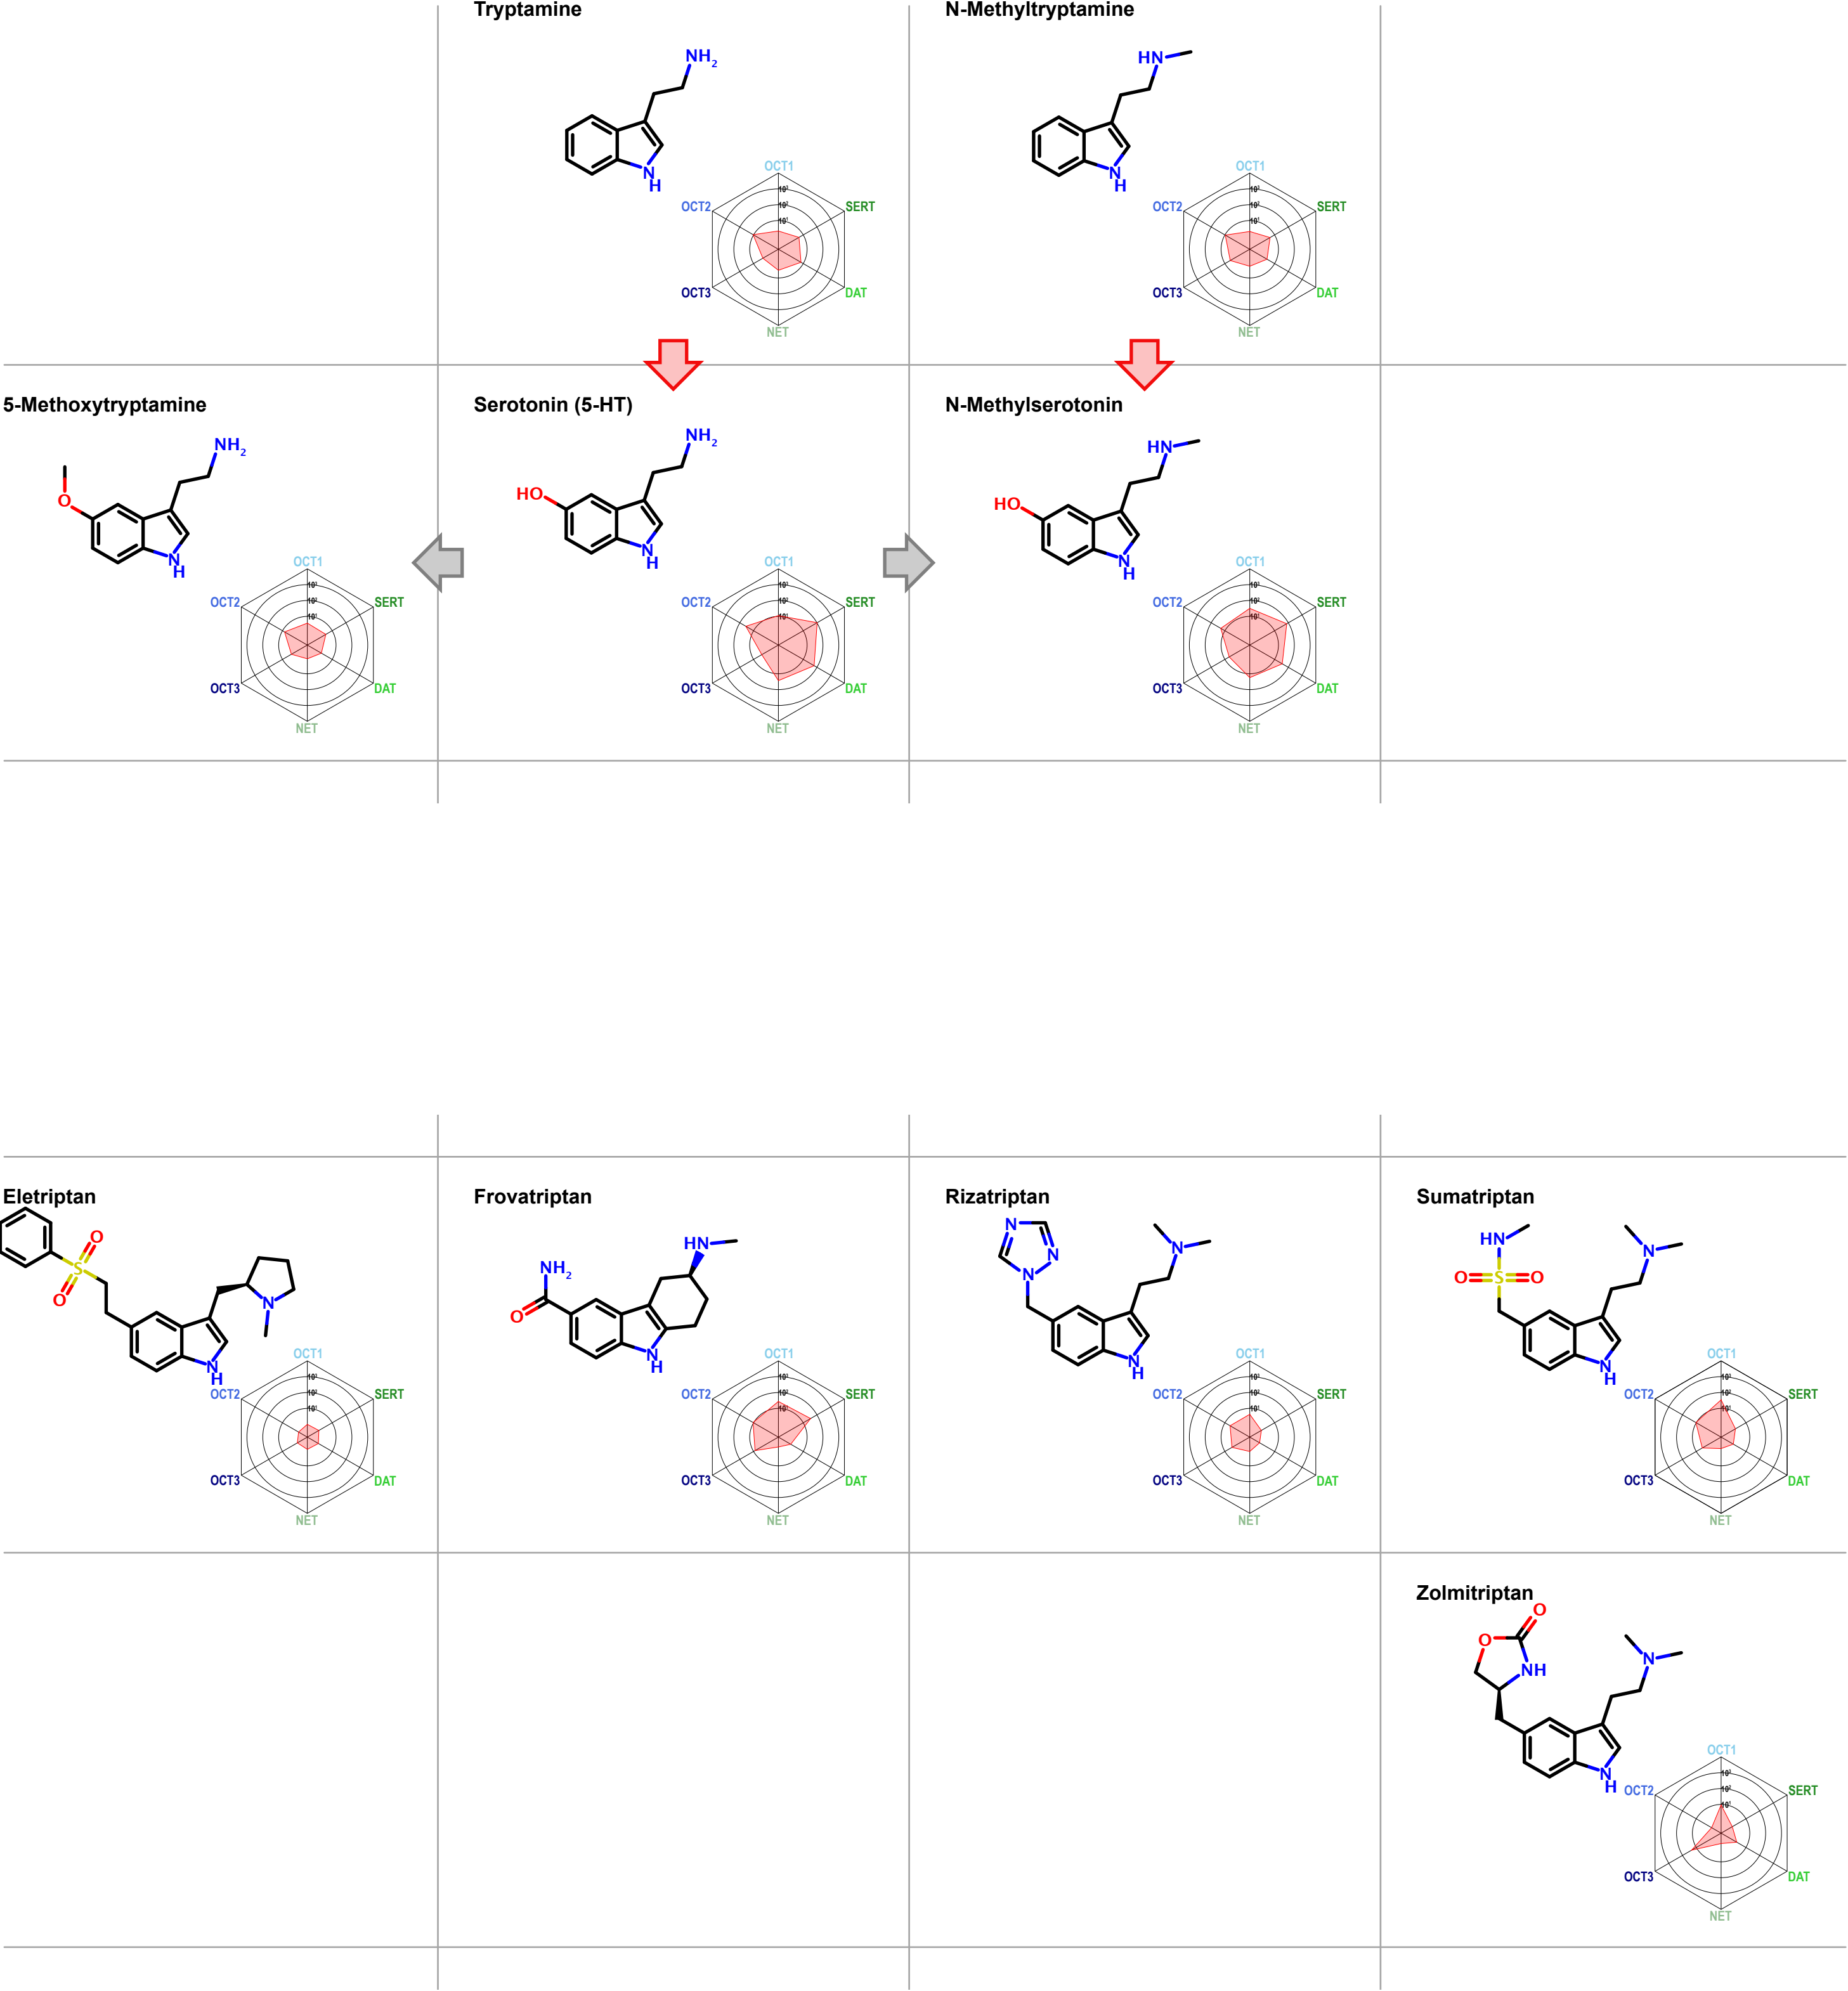

 hydroxylation  
 methylation  
 constitutional isomers

Figure S1: Molecule Structures and Ratio Plots

Beta-adrenergic Agonists and Others

Dobutamine

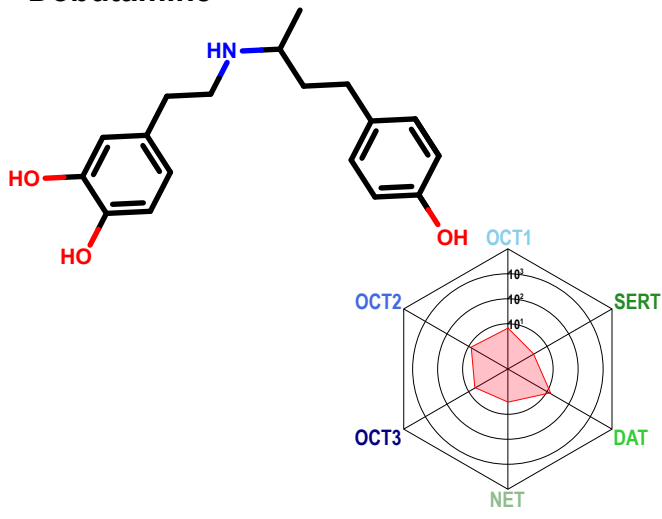

Fenoterol

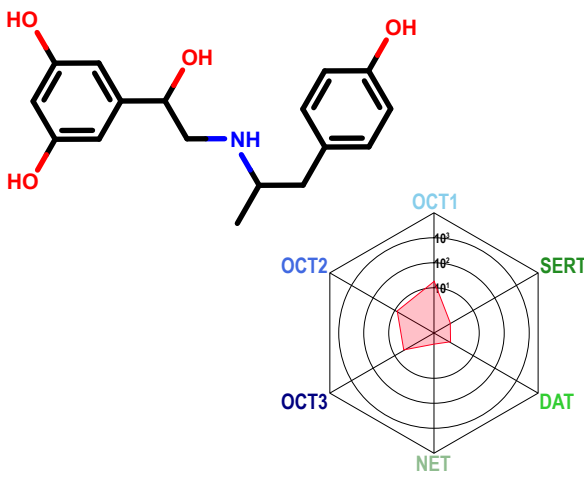

Formoterol

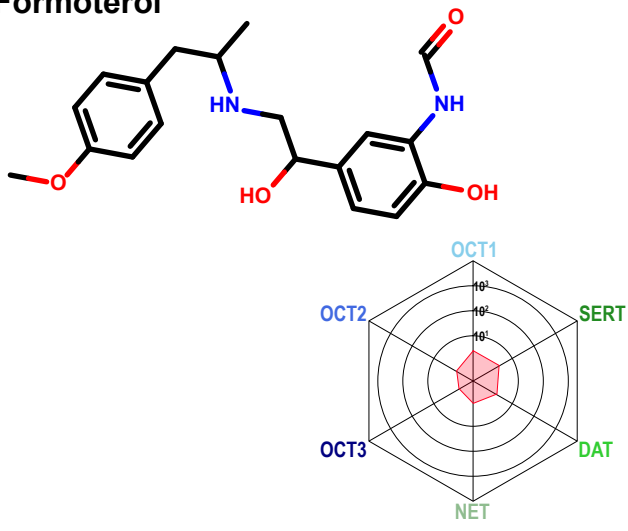

Ractopamine

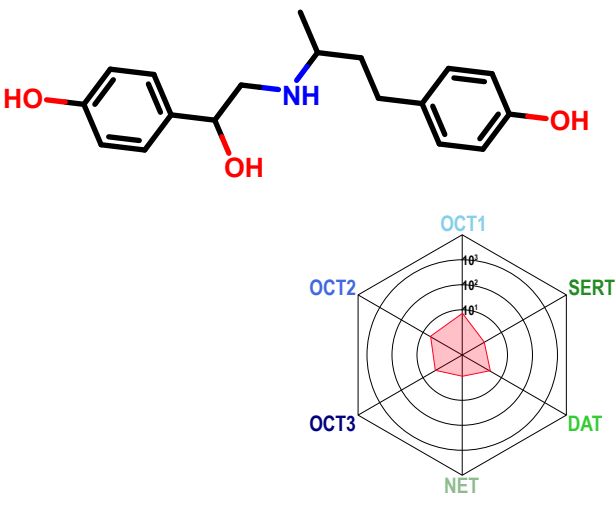

Clenbuterol

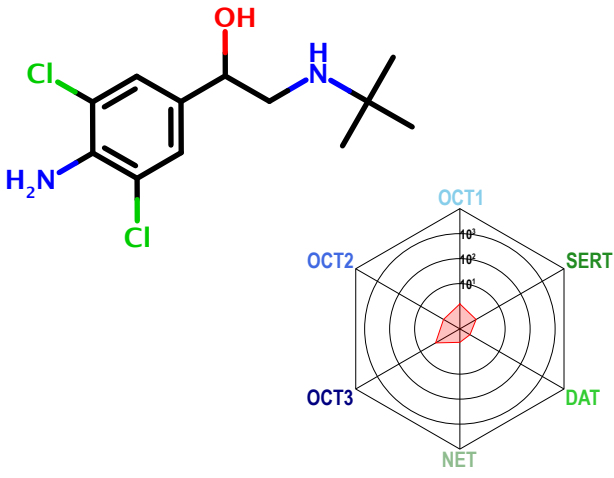

Ethambutol

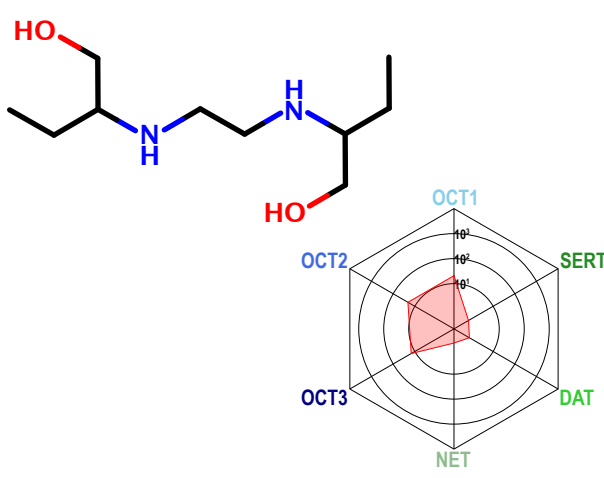

Metaiodobenzylguanidine

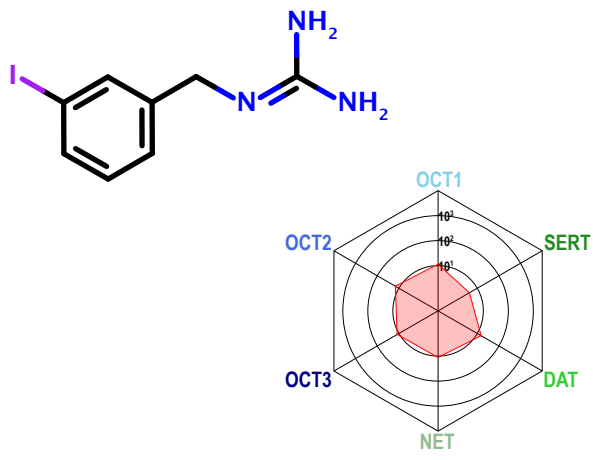

MPP+

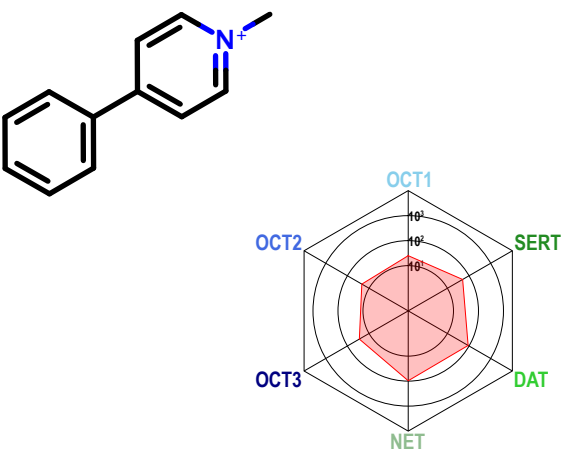

Salsolinol

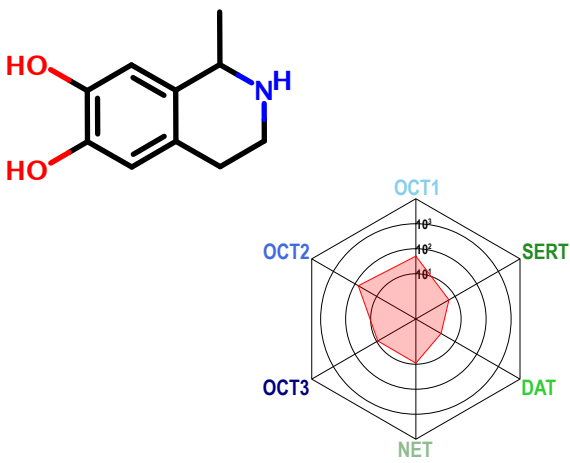

Sotalolol

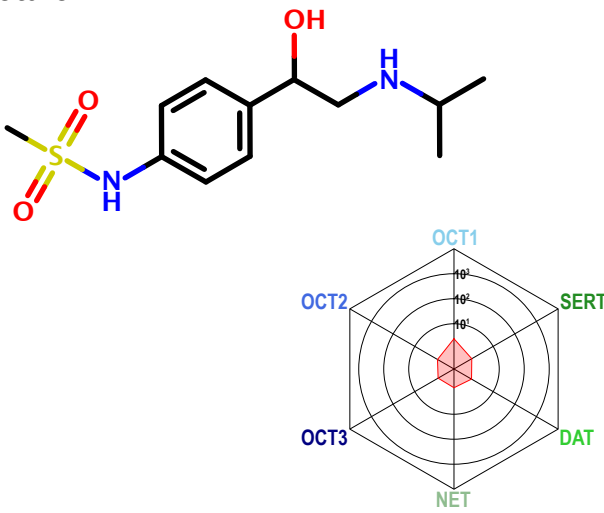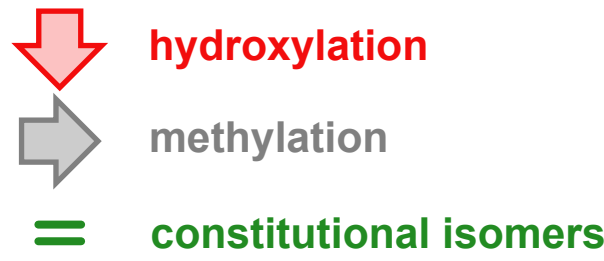

Supplement: s1 [file s1]
