# Supplementary material for: Overlap and Specificity in the Substrate Spectra of Human Monoamine Transporters and Organic Cation Transporters 1, 2, and 3
Source: MDPI journal article supplement (doi:10.3390/ijms222312816), 2021-11-26

## N-Methylation

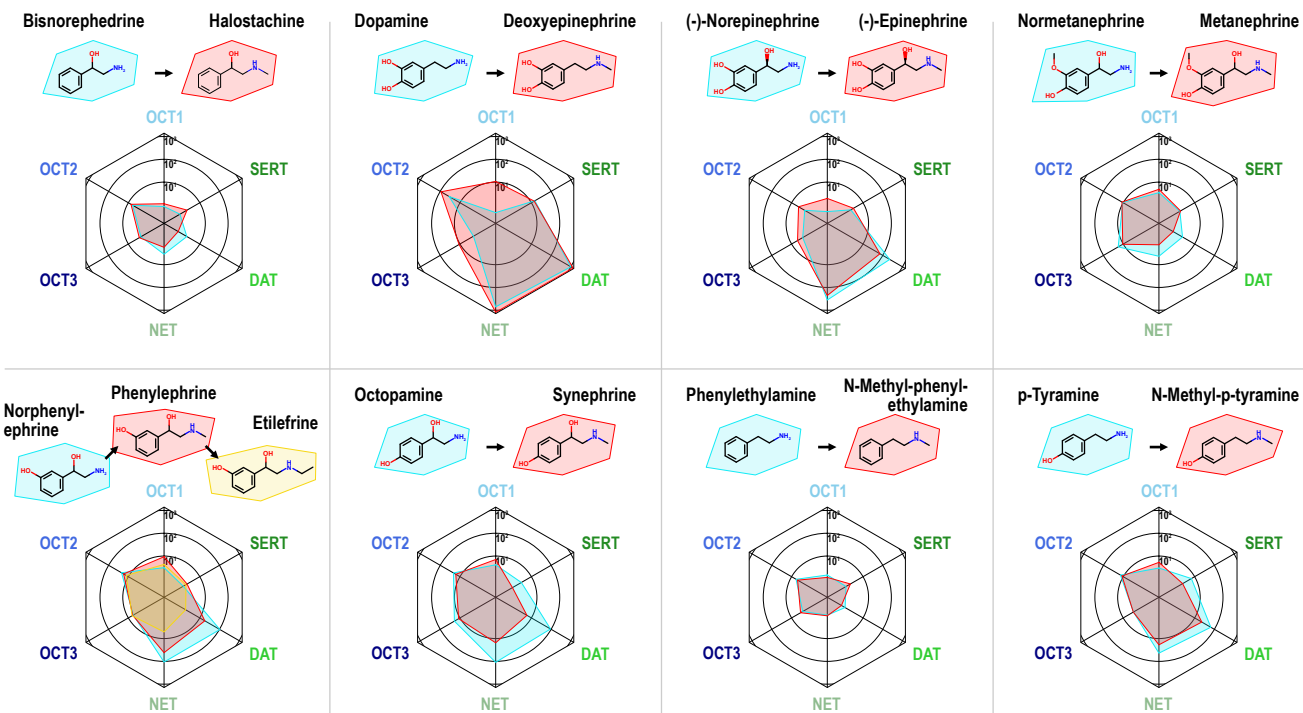

## Meta-Hydroxylation

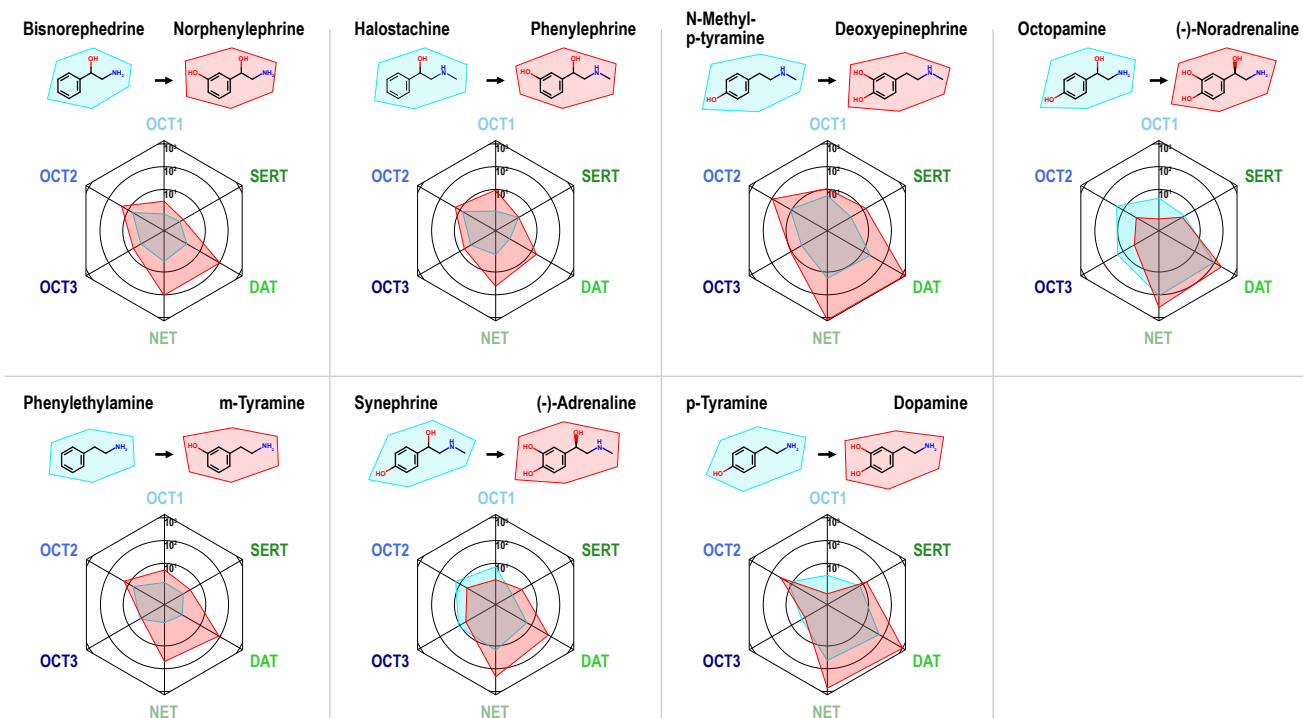

## O-Methylation

Dopamine 3-Methoxy-p-tyramine

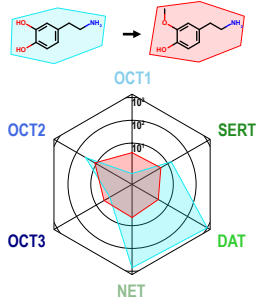

Dopamine 4-Methoxy-m-tyramine

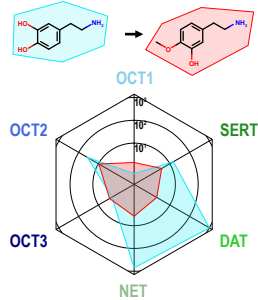

(-)-Adrenaline Metanephrine

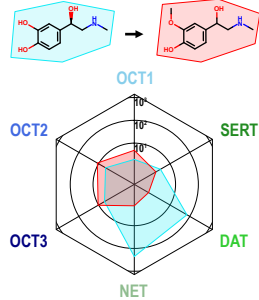

(-)-Noradrenaline Normetanephrine

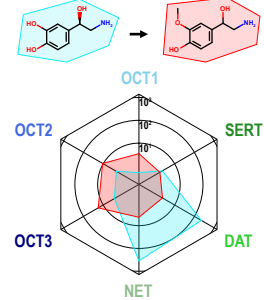

## Para-Hydroxylation

Bisnorephedrine Octopamine

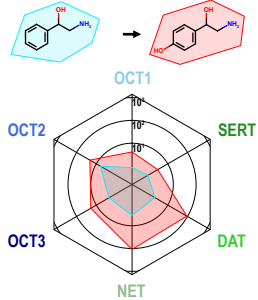

Halostachine Synephrine

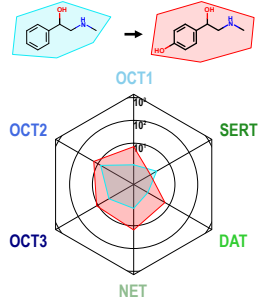

N-Methyl-phenylethylamine N-Methyl-p-tyramine

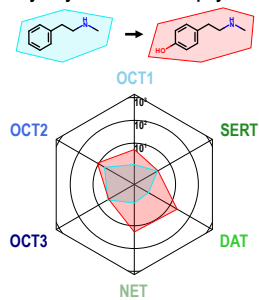

Norphenylephrine (-)-Noradrenaline

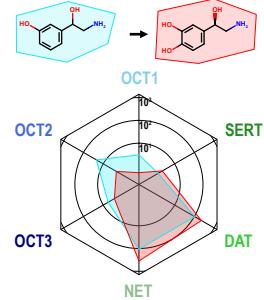

Phenylephrine (-)-Adrenaline

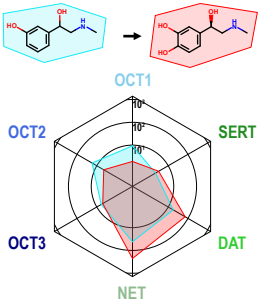

Phenylethylamine p-Tyramine

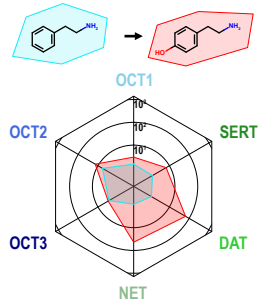

m-Tyramine Dopamine

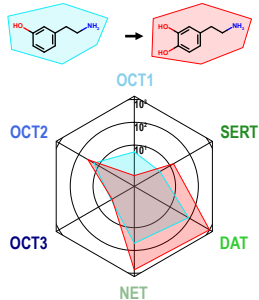

# Beta-Hydroxylation

Deoxyepinephrine → (-)-Adrenaline

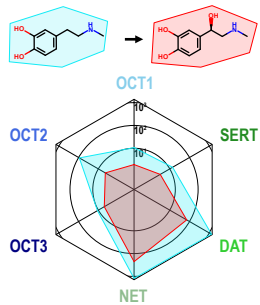

Dopamine → (-)-Noradrenaline

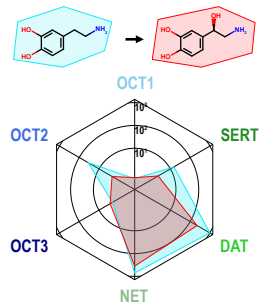

3-Methoxy-p-tyramine → Normetanephrine

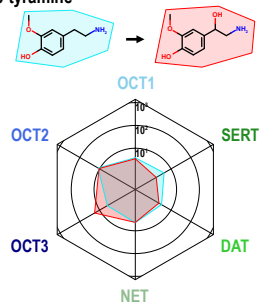

N-Methyl-phenylethylamine → Halostachine

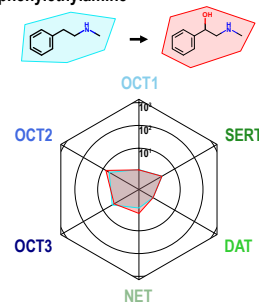

N-Methyl-p-tyramine → Synephrine

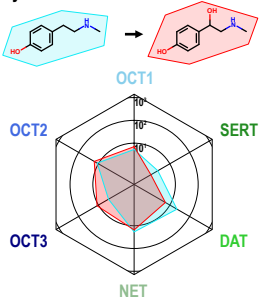

Phenylethylamine → Bisnorephedrine

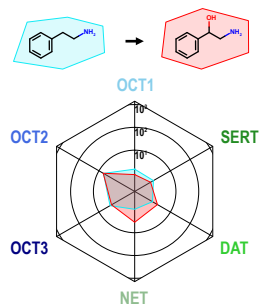

m-Tyramine → Norphenylephrine

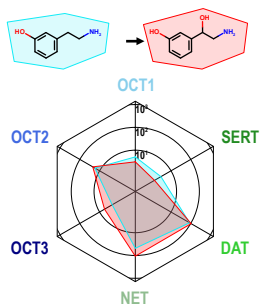

p-Tyramine → Octopamine

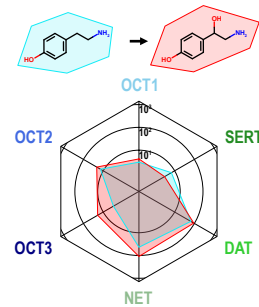

Supplement: s1 [file s1]
