# Supplementary material for: Overlap and Specificity in the Substrate Spectra of Human Monoamine Transporters and Organic Cation Transporters 1, 2, and 3
Source: MDPI journal article supplement (doi:10.3390/ijms222312816), 2021-11-26

## 5'-Hydroxylation

N-Methyl-tryptamine

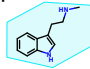

N-Methyl-serotonin

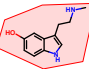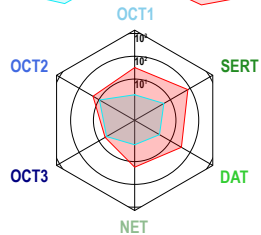

Tryptamine

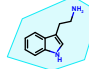

Serotonin

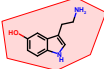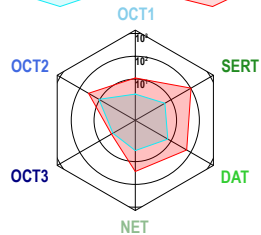

## Methylation of 5'-OH

Serotonin

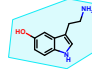

5-Methoxytryptamine

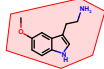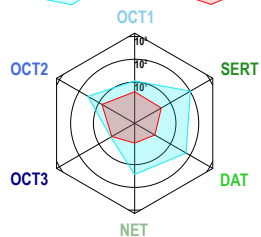

## N-Methylation

Tryptamine

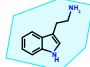

N-Methyltryptamine

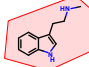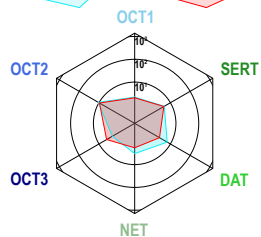

Serotonin

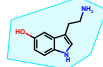

N-Methylserotonin

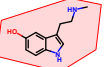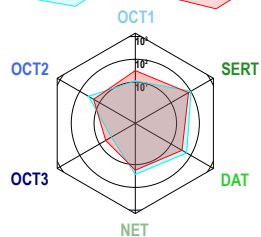

Supplement: s1 [file s1]
