# Supplementary material for: Overlap and Specificity in the Substrate Spectra of Human Monoamine Transporters and Organic Cation Transporters 1, 2, and 3
Source: MDPI journal article supplement (doi:10.3390/ijms222312816), 2021-11-26
Supplement: s1 [file s1]

# Overlap and specificity in the Substrate Spectra of Human

## Monoamine Transporters and Organic Cation Transporters 1-3

Lukas Gebauer, Ole Jensen, Maria Neif, Jürgen Brockmöller, Christof Dückler

Institute of Clinical Pharmacology, University Medical Center Göttingen, D-37075 Göttingen, Germany

### Supporting Information

#### Table of Contents

Figure S1: Molecule structures and comparative ratio plots (separate file);

Figure S2: Transporter-specificity plots, sequence identity and uptake correlation matrices;

Figure S3: Comparative uptake of frovatriptan and serotonin by SERT;

Figure S4: Concentration-dependent uptake of serotonin and *N*-methyl serotonin by MATs and OCTs. Bar plots and correlation of kinetic parameters with uptake ratios;

Figure S5: Matched molecular pair analyses of phenylethylamine-based compounds (separate file);

Figure S6: Matched molecular pair analyses of tryptamine-based compounds (separate file);

Figure S7: Concentration-dependent uptake of monoamine neurotransmitters and their precursor compounds by MATs;

Table S1: SMILES codes of investigated drugs and uptake ratios via investigated transporters (separate file);

Table S2: Kinetic parameters of frovatriptan, serotonin and *N*-methyl serotonin uptake by MATs and OCTs; Table S3: Manufacturers, HPLC mobile phases and mass spectrometry detection parameters of analytes and internal standards;

Table S3: Comparison of chemical descriptors for highly transported substrates (defined by a transport ratio >3) of OCTs and MATs;

Table S4: Kinetic parameters of phenylethylamine, tryptamine and endogenous monoamine neurotransmitter uptake by MATs;

Table S5: Manufacturers, HPLC mobile phases and mass spectrometry detection parameters of analytes and internal standards

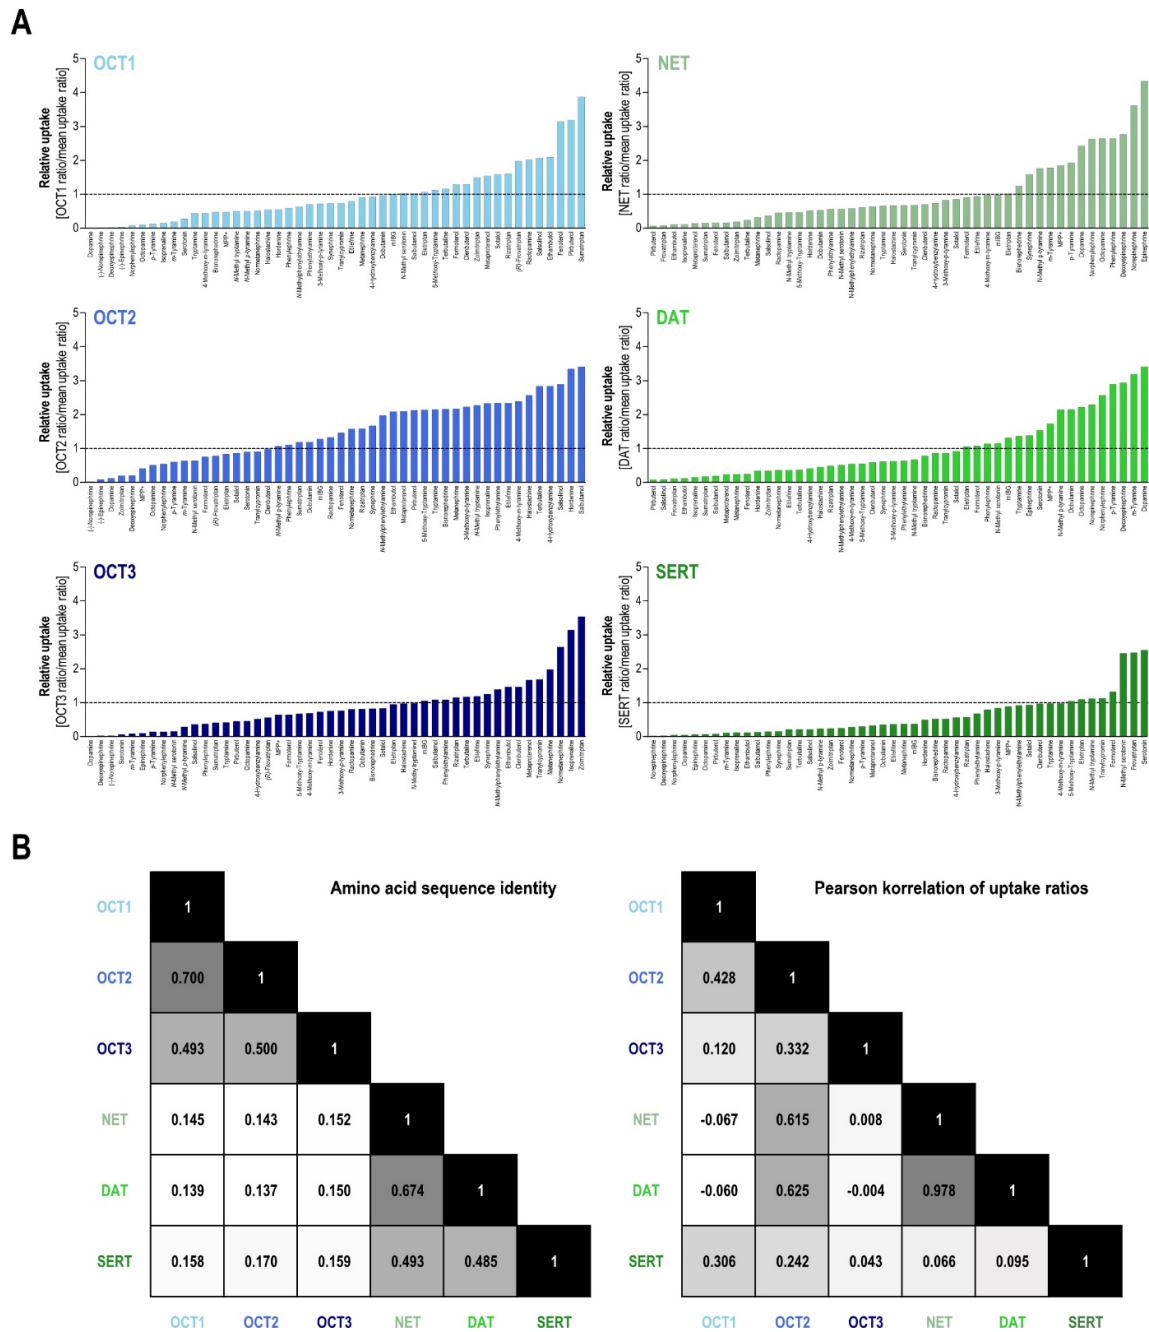

**Figure S2: (A)** Specificity of transporter uptake ratios. Specificity was calculated by dividing the uptake ratio for each transporter by the mean uptake ratio among all six transporters. **(B)** Amino acid sequence identity as determined by the “Multiple Sequence Comparison by Log-Expectation” (MUSCLE) provided by the European Bioinformatics Institute, Hinxton (<https://www.ebi.ac.uk/>), and correlation of uptake ratios for all six transporters.

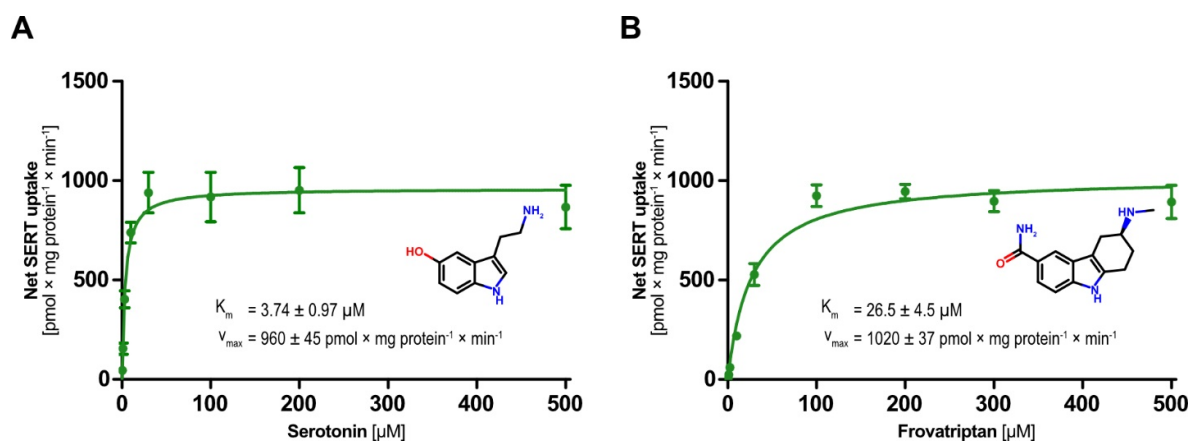

**Figure S3** Uptake kinetics of serotonin (**A**) and frovatriptan (**B**) for SERT transport. Data is shown as mean  $\pm$  SEM of at least three independent experiments.

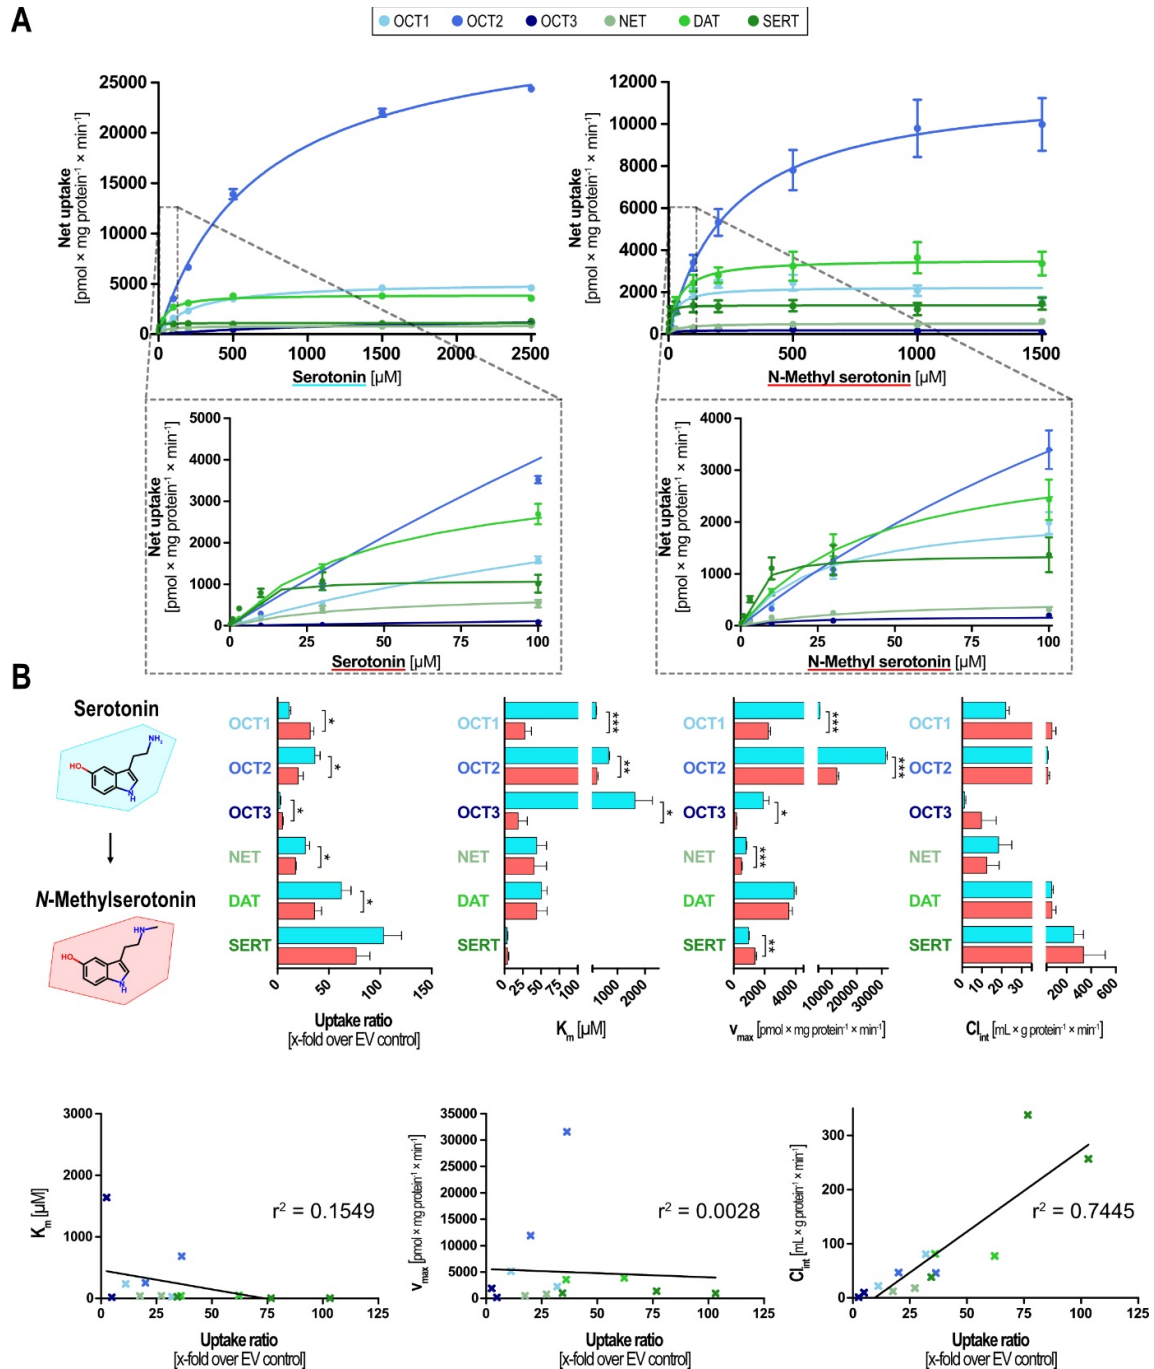

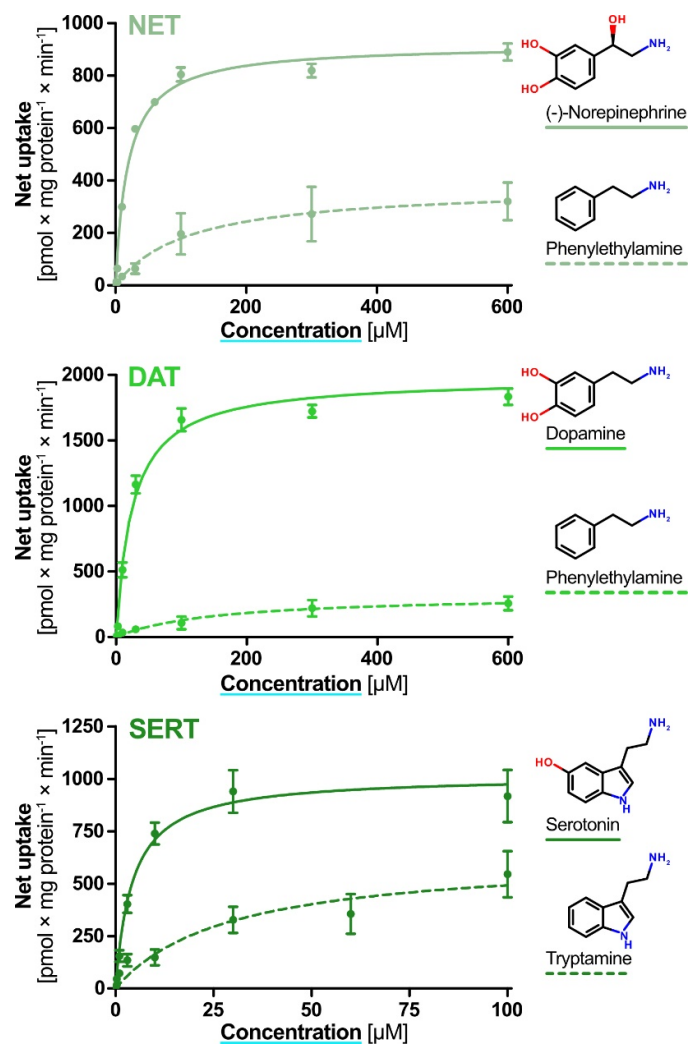

**Figure S7** Concentration-dependent uptake of monoamine neurotransmitters and their precursor compounds by MATs NET, DAT and SERT. Data is shown as mean ± SEM of at least three independent experiments.

**Table S2** Kinetic parameters of frovatriptan, serotonin and *N*-methyl serotonin uptake by MATs and OCTs

| Transporter | Substrate                  | Uptake ratio<br>[x-fold over<br>EV control] | $K_m \pm \text{SEM}$<br>[ $\mu\text{M}$ ] | $V_{\max} \pm \text{SEM}$<br>[ $\text{pmol} \times \text{mg protein}^{-1} \times \text{min}^{-1}$ ] | $\text{Cl}_{\text{int}} \pm \text{SEM}$<br>[ $\text{mL} \times \text{g protein}^{-1} \times \text{min}^{-1}$ ] |
|-------------|----------------------------|---------------------------------------------|-------------------------------------------|-----------------------------------------------------------------------------------------------------|----------------------------------------------------------------------------------------------------------------|
| OCT1        | <i>N</i> -Methyl serotonin | $31.9 \pm 3.6$                              | $27.78 \pm 9.19$                          | $2237 \pm 135$                                                                                      | $80.52 \pm 31.52$                                                                                              |
|             | Serotonin                  | $11.2 \pm 2.0$                              | $235.6 \pm 15.50$                         | $5161 \pm 95.0$                                                                                     | $21.91 \pm 1.844$                                                                                              |
| OCT2        | <i>N</i> -Methyl serotonin | $20.1 \pm 5.0$                              | $253.9 \pm 54.98$                         | $11918 \pm 804$                                                                                     | $46.93 \pm 13.33$                                                                                              |
|             | Serotonin                  | $36.4 \pm 5.1$                              | $685.6 \pm 33.08$                         | $31565 \pm 558$                                                                                     | $46.04 \pm 3.04$                                                                                               |
| OCT3        | <i>N</i> -Methyl serotonin | $4.9 \pm 0.7$                               | $18.78 \pm 12.42$                         | $181.7 \pm 20.9$                                                                                    | $9.68 \pm 7.51$                                                                                                |
|             | Serotonin                  | $2.5 \pm 0.7$                               | $1641 \pm 630.2$                          | $1915 \pm 366$                                                                                      | $1.17 \pm 0.67$                                                                                                |
| NET         | <i>N</i> -Methyl serotonin | $17.6 \pm 0.6$                              | $40.57 \pm 16.90$                         | $505.4 \pm 41.1$                                                                                    | $81.24 \pm 31.96$                                                                                              |
|             | Serotonin                  | $27.2 \pm 4.1$                              | $44.16 \pm 13.33$                         | $809.4 \pm 47.99$                                                                                   | $18.83 \pm 6.62$                                                                                               |
| DAT         | <i>N</i> -Methyl serotonin | $36.0 \pm 6.8$                              | $43.82 \pm 14.39$                         | $3560 \pm 232$                                                                                      | $81.24 \pm 31.96$                                                                                              |
|             | Serotonin                  | $62.1 \pm 9.4$                              | $50.50 \pm 7.640$                         | $3908 \pm 119.0$                                                                                    | $77.39 \pm 14.06$                                                                                              |
| SERT        | Frovatriptan               | $34.3 \pm 3.4$                              | $26.51 \pm 4.52$                          | $1020 \pm 36.5$                                                                                     | $38.48 \pm 7.93$                                                                                               |
|             | <i>N</i> -Methyl serotonin | $76.6 \pm 13.1$                             | $4.065 \pm 1.829$                         | $1373.0 \pm 93.0$                                                                                   | $337.7 \pm 174.8$                                                                                              |
|             | Serotonin                  | $103.2 \pm 17.5$                            | $3.736 \pm 0.972$                         | $960 \pm 44.9$                                                                                      | $256.9 \pm 78.90$                                                                                              |

**Table S3** Comparison of chemical descriptors for highly transported substrates (defined by a transport ratio >3) of OCTs and MATs. Data is provided as means (min;max), p-values are results from the overall group comparisons using the Kruskal-Wallis test. Charge and logD at pH 7.4 were calculated using the software cxcalc from ChemAxon, Budapest, Hungary, the remaining molecular descriptors were calculated using RDKit, RDKit: open-source cheminformatics software, <https://www.rdkit.org/> (accessed Oct 7, 2021).

| Descriptor                                            | OCT1                  | OCT2                  | OCT3                  | NET                   | DAT                   | SERT                  | p-Value |
|-------------------------------------------------------|-----------------------|-----------------------|-----------------------|-----------------------|-----------------------|-----------------------|---------|
| Number of highly transported substrates (% of tested) | 29/48                 | 41/48                 | 32/48                 | 23/48                 | 18/48                 | 17/48                 |         |
| logD at pH 7.4                                        | -0.97 (-2.25 ; 1.16)  | -1.01 (-2.25 ; 1.16)  | -1.0 (-2.25 ; 1.16)   | -1.12 (-1.82 ; 1.16)  | -1.15 (-1.82 ; 1.16)  | -1.15 (-1.74 ; 0.15)  | 0.831   |
| Total polar surface area                              | 60.2 (3.9 ; 93.0)     | 55.1 (3.9 ; 93.0)     | 56.1 (3.9 ; 93.0)     | 55.3 (3.9 ; 86.7)     | 55.0 (3.9 ; 86.7)     | 52.0 (3.9 ; 72.7)     | 0.637   |
| Charge at pH 7.4                                      | 1.0 (1.0 ; 1.0)       | 1.0 (1.0 ; 1.0)       | 1.0 (1.0 ; 1.0)       | 1.0 (1.0 ; 1.0)       | 1.0 (1.0 ; 1.0)       | 1.0 (1.0 ; 1.0)       |         |
| Molar Mass                                            | 211.8 (137.2 ; 303.4) | 192.1 (121.2 ; 303.4) | 202.4 (133.2 ; 303.4) | 175.7 (137.2 ; 301.4) | 176.7 (137.2 ; 301.4) | 177.9 (137.2 ; 275.1) | 0.029   |
| Heavy Atom Count                                      | 15 (10 ; 22)          | 13.7 (9 ; 22)         | 14.3 (10 ; 22)        | 12.4 (10 ; 22)        | 12.5 (10 ; 18)        | 12.5 (10 ; 18)        | 0.011   |
| Heavy Atom Molar Mass                                 | 195.7 (126.1 ; 282.2) | 177.2 (110.1 ; 282.2) | 186.7 (122.1 ; 282.2) | 162.9 (126.1 ; 278.2) | 163.9 (126.1 ; 278.2) | 165.2 (126.1 ; 265.0) | 0.025   |
| Number of H bond acceptors                            | 3.1 (0 ; 5)           | 2.8 (0 ; 5)           | 2.9 (0 ; 5)           | 2.6 (0 ; 4)           | 2.5 (0 ; 4)           | 2.2 (0 ; 4)           | 0.116   |
| Number of H bond donors                               | 2.9 (0 ; 5)           | 2.7 (0 ; 5)           | 2.8 (0 ; 5)           | 2.7 (0 ; 4)           | 2.7 (0 ; 4)           | 2.4 (0 ; 4)           | 0.683   |
| Number of Heteroatoms                                 | 3.6 (1 ; 6)           | 3.2 (1 ; 6)           | 3.4 (1 ; 6)           | 2.9 (1 ; 4)           | 2.9 (1 ; 4)           | 2.8 (1 ; 4)           | 0.055   |
| Number of rotatable bonds                             | 3.6 (0 ; 9)           | 3.2 (0 ; 9)           | 3.4 (0 ; 9)           | 2.6 (0 ; 7)           | 2.6 (1 ; 7)           | 2.2 (0 ; 3)           | 0.005   |
| Number of valence electrons                           | 81.2 (54 ; 118)       | 74.4 (48 ; 118)       | 78.2 (52 ; 118)       | 67.0 (54 ; 118)       | 66.7 (54 ; 118)       | 66.8 (54 ; 94)        | 0.008   |
| Ring Count                                            | 1.5 (0 ; 3)           | 1.3 (0 ; 3)           | 1.4 (0 ; 3)           | 1.3 (1 ; 2)           | 1.3 (1 ; 2)           | 1.5 (1 ; 3)           | 0.701   |



**Table S4** Kinetic parameters of phenylethylamine, tryptamine and endogenous monoamine neurotransmitter uptake by MATs

| Transporter | Substrate          | Uptake ratio<br>[x-fold over<br>EV control] | $K_m \pm \text{SEM}$<br>[ $\mu\text{M}$ ] | $V_{\max} \pm \text{SEM}$<br>[ $\text{pmol} \times \text{mg protein}^{-1} \times \text{min}^{-1}$ ] | $\text{Cl}_{\text{int}} \pm \text{SEM}$<br>[ $\text{mL} \times \text{g protein}^{-1} \times \text{min}^{-1}$ ] |
|-------------|--------------------|---------------------------------------------|-------------------------------------------|-----------------------------------------------------------------------------------------------------|----------------------------------------------------------------------------------------------------------------|
| NET         | (-)-Norepinephrine | 355<br>$\pm 67.6$                           | 19.2<br>$\pm 1.7$                         | 918<br>$\pm 18.2$                                                                                   | 47.8<br>$\pm 5.2$                                                                                              |
|             | Phenylethylamine   | 1.49<br>$\pm 0.23$                          | 113<br>$\pm 72.4$                         | 380.3<br>$\pm 78.4$                                                                                 | 3.4<br>$\pm 2.9$                                                                                               |
| DAT         | Dopamine           | 1000<br>$\pm 70.5$                          | 25.1<br>$\pm 3.0$                         | 1977<br>$\pm 46.2$                                                                                  | 78.9<br>$\pm 11.2$                                                                                             |
|             | Phenylethylamine   | 1.62<br>$\pm 0.45$                          | 156<br>$\pm 76.4$                         | 325<br>$\pm 54.1$                                                                                   | 2.1<br>$\pm 1.4$                                                                                               |
| SERT        | Serotonin          | 103.2 $\pm$<br>17.5                         | 3.736<br>$\pm 0.972$                      | 960<br>$\pm 44.9$                                                                                   | 256.9<br>$\pm 78.9$                                                                                            |
|             | Tryptamine         | 4.88<br>$\pm 1.30$                          | 29.0<br>$\pm 16.2$                        | 634.6<br>$\pm 129.5$                                                                                | 22.0<br>$\pm 16.7$                                                                                             |

**Table S5:** Manufacturers, HPLC mobile phases and mass spectrometry detection parameters of analytes and internal standards

| Compound                                                                                                 | Manufacturer                     | RT<br>[min] | Mass<br>Q1<br>[Da] | Mass Q3<br>[Da]      | DP<br>[V] | CE<br>[V]  | CXP<br>[V] | Internal<br>standard |
|----------------------------------------------------------------------------------------------------------|----------------------------------|-------------|--------------------|----------------------|-----------|------------|------------|----------------------|
| <b>3% organic additive</b> (96.9% H <sub>2</sub> O, 0.1 % formic acid, 2.6% acetonitrile, 0.4% methanol) |                                  |             |                    |                      |           |            |            |                      |
| Bisnorephedrine                                                                                          | Sigma-Aldrich                    | 4.29        | 137.890            | 119.910<br>(63.910)  | 29        | 12<br>(37) | 8<br>(12)  | Buformin             |
| Deoxyepinephrine                                                                                         | Toronto<br>Research<br>Chemicals | 3.92        | 168.109            | 137.100<br>(91.100)  | 56        | 18<br>(38) | 8<br>(16)  | Buformin             |
| Dopamine                                                                                                 | Sigma-Aldrich                    | 3.57        | 154.100            | 137.200<br>(91.000)  | 36        | 15<br>(33) | 10<br>(8)  | Buformin             |
| Epinephrine                                                                                              | Sigma-Aldrich                    | 3.17        | 184.100            | 135.000<br>(166.100) | 36        | 15<br>(13) | 8<br>(10)  | Buformin             |
| Ethambutol                                                                                               | Sigma-Aldrich                    | 2.54        | 205.200            | 116.100<br>(55.100)  | 66        | 21<br>(45) | 6<br>(10)  | Buformin             |
| Etilefrine                                                                                               | Santa-Cruz<br>Biotechnology      | 4.46        | 182.124            | 164.000<br>(91.000)  | 51        | 17<br>(37) | 10<br>(6)  | Buformin             |
| Halostachine                                                                                             | Sigma-Aldrich                    | 4.63        | 152.100            | 134.000<br>(119.000) | 41        | 13<br>(27) | 8<br>(8)   | Buformin             |
| Hordenine                                                                                                | Sigma-Aldrich                    | 4.49        | 166.140            | 121.000<br>(77.000)  | 51        | 21<br>(47) | 8<br>(10)  | Buformin             |
| Isoprenaline                                                                                             | Sigma-Aldrich                    | 4.02        | 212.200            | 151.900<br>(107.000) | 41        | 23<br>(37) | 10<br>(6)  | Buformin             |
| Metanephrine                                                                                             | Toronto<br>Research<br>Chemicals | 3.51        | 198.100            | 165.000<br>(120.000) | 41        | 25<br>(29) | 10<br>(8)  | Buformin             |
| Metaproterenol                                                                                           | Sigma-Aldrich                    | 4.63        | 212.130            | 152.000<br>(107.000) | 56        | 23<br>(39) | 10<br>(8)  | Buformin             |
| 3-Methoxy <i>p</i> -tyramine                                                                             | Toronto<br>Research<br>Chemicals | 4.81        | 168.100            | 91.000<br>(119.000)  | 41        | 33<br>(25) | 16<br>(8)  | Buformin             |
| 4-Methoxy <i>m</i> -tyramine                                                                             | Sigma-Aldrich                    | 5.45        | 168.120            | 91.000<br>(118.900)  | 41        | 33<br>(25) | 16<br>(8)  | Buformin             |
| <i>N</i> -Methyl <i>p</i> -tyramine                                                                      | Santa-Cruz<br>Biotechnology      | 4.42        | 152.100            | 121.200<br>(103.100) | 51        | 17<br>(31) | 8<br>(6)   | Buformin             |
| Norepinephrine                                                                                           | Santa-Cruz<br>Biotechnology      | 2.99        | 170.200            | 107.000<br>(152.000) | 36        | 28<br>(10) | 20<br>(10) | Buformin             |
| Normetanephrine                                                                                          | Sigma-Aldrich                    | 3.32        | 184.100            | 166.000<br>(134.000) | 36        | 9<br>(25)  | 10<br>(8)  | Buformin             |
| Norphenylephrine                                                                                         | Sigma-Aldrich                    | 3.31        | 154.180            | 91.100<br>(136.000)  | 39        | 29<br>(11) | 16<br>(8)  | Buformin             |
| Octopamine                                                                                               | Sigma-Aldrich                    | 3.02        | 154.000            | 91.000<br>(136.000)  | 36        | 29<br>(11) | 16<br>(8)  | Buformin             |
| Phenylephrine                                                                                            | Toronto<br>Research<br>Chemicals | 3.93        | 168.210            | 91.000<br>(77.000)   | 41        | 30<br>(56) | 11<br>(4)  | Buformin             |
| Salsolinol                                                                                               | Sigma-Aldrich                    | 3.96        | 180.080            | 117.100<br>(145.200) | 81        | 31<br>(25) | 8<br>(10)  | Buformin             |
| Serotonin                                                                                                | Sigma-Aldrich                    | 5.37        | 177.100            | 160.100<br>(132.000) | 53        | 17<br>(30) | 10<br>(10) | Serotonin-d4         |
| Synephrine                                                                                               | Sigma-Aldrich                    | 3.20        | 167.691            | 149.900<br>(135.000) | 36        | 35<br>(35) | 12<br>(8)  | Buformin             |
| <i>m</i> -Tyramine                                                                                       | Toronto<br>Research<br>Chemicals | 4.30        | 138.100            | 121.100<br>(64.000)  | 31        | 15<br>(37) | 8<br>(12)  | Buformin             |
| <i>p</i> -Tyramine                                                                                       | Sigma-Aldrich                    | 4.16        | 138.100            | 121.100<br>(77.000)  | 43        | 14<br>(36) | 12<br>(15) | Buformin             |
| Buformin                                                                                                 | Wako<br>Chemicals                | 4.00        | 158.000            | 60.000<br>(47.000)   | 40        | 35<br>(66) | 10<br>(8)  | -                    |
| Serotonin-d4                                                                                             | Santa-Cruz<br>Biotechnology      | 5.37        | 181.100            | 164.100<br>(136.200) | 46        | 15<br>(32) | 10<br>(8)  | -                    |

| <b>8% organic additive (91.9% H2O, 0.1 % formic acid, 6.9% acetonitrile, 1.1% methanol)</b>   |                                  |       |         |                      |     |            |            |                |
|-----------------------------------------------------------------------------------------------|----------------------------------|-------|---------|----------------------|-----|------------|------------|----------------|
| 4-Hydroxybenzylamine                                                                          | Sigma-Aldrich                    | 2.96  | 124.100 | 77.000<br>(107.000)  | 29  | 35<br>(9)  | 14<br>(6)  | Aciclovir      |
| Frovatriptan                                                                                  | Sigma-Aldrich                    | 5.11  | 244.300 | 213.000<br>(170.100) | 56  | 19<br>(34) | 14<br>(10) | Ranitidin-d6   |
| N-Methyl serotonin                                                                            | Toronto<br>Research<br>Chemicals | 4.06  | 191.101 | 160.000<br>(148.000) | 60  | 17<br>(17) | 10<br>(10) | Aciclovir      |
| Phenylethylamine                                                                              | Sigma-Aldrich                    | 3.66  | 122.130 | 77.000<br>(79.000)   | 44  | 41<br>(31) | 6<br>(16)  | Metaproterenol |
| Pirbuterol                                                                                    | Sigma-Aldrich                    | 3.70  | 241.300 | 167.200<br>(149.100) | 65  | 24<br>(30) | 15<br>(15) | Aciclovir      |
| Salbutamol                                                                                    | Sigma-Aldrich                    | 3.88  | 240.200 | 148.200<br>(222.200) | 60  | 24<br>(24) | 15<br>(15) | Aciclovir      |
| Sotalol                                                                                       | Santa-Cruz<br>Biotechnology      | 4.11  | 273.370 | 255.100<br>(133.100) | 61  | 17<br>(37) | 16<br>(8)  | Aciclovir      |
| Sumatriptan                                                                                   | Sigma-Aldrich                    | 6.52  | 296.200 | 58.200<br>(251.200)  | 50  | 30<br>(24) | 12<br>(12) | Aciclovir      |
| Terbutaline                                                                                   | Sigma-Aldrich                    | 3.98  | 226.200 | 152.100<br>(107.000) | 60  | 23<br>(40) | 10<br>(10) | Aciclovir      |
| Tryptamine                                                                                    | Sigma-Aldrich                    | 6.11  | 161.060 | 144.000<br>(117.000) | 41  | 13<br>(31) | 10<br>(8)  | Ranitidin-d6   |
| Aciclovir                                                                                     | Sigma-Aldrich                    | 3.78  | 225.980 | 151.900<br>(134.930) | 46  | 17<br>(40) | 10<br>(8)  | -              |
| Metaproterenol                                                                                | Sigma-Aldrich                    | 3.66  | 212.130 | 152.000<br>(107.000) | 56  | 23<br>(39) | 10<br>(8)  | -              |
| Ranitidine-d6                                                                                 | Toronto<br>Research<br>Chemicals | 4.09  | 321.200 | 176.000<br>(130.100) | 65  | 25<br>(35) | 15<br>(15) | -              |
| <b>20% organic additive (79.9% H2O, 0.1 % formic acid, 17.2% acetonitrile, 2.8% methanol)</b> |                                  |       |         |                      |     |            |            |                |
| 5-Methoxy tryptamine                                                                          | Sigma-Aldrich                    | 3.50  | 191.035 | 174.100<br>(159.100) | 46  | 13<br>(31) | 10<br>(10) | Tulobuterol    |
| Clenbuterol                                                                                   | Sigma-Aldrich                    | 4.84  | 277.110 | 258.900<br>(203.000) | 66  | 15<br>(23) | 18<br>(14) | Tulobuterol    |
| Dobutamine                                                                                    | Sigma-Aldrich                    | 4.22  | 302.202 | 137.000<br>(106.900) | 66  | 30<br>(37) | 10<br>(6)  | Tulobuterol    |
| Eletriptan                                                                                    | Sigma-Aldrich                    | 12.70 | 383.300 | 144.000<br>(84.000)  | 85  | 40<br>(40) | 10<br>(16) | Talinolol      |
| Fenoterol                                                                                     | Sigma-Aldrich                    | 3.50  | 304.100 | 107.100<br>(135.200) | 70  | 44<br>(24) | 12<br>(12) | Tulobuterol    |
| Formoterol                                                                                    | Sigma-Aldrich                    | 4.97  | 345.200 | 149.100<br>(121.100) | 70  | 28<br>(42) | 15<br>(15) | Tulobuterol    |
| mIBG                                                                                          | Sigma-Aldrich                    | 5.69  | 276.090 | 217.000<br>(90.000)  | 76  | 29<br>(54) | 14<br>(16) | Tulobuterol    |
| MPP+                                                                                          | Sigma-Aldrich                    | 3.51  | 170.016 | 128.100<br>(102.200) | 100 | 42<br>(63) | 8<br>(6)   | Tulobuterol    |
| N-Methyl<br>phenylethylamine                                                                  | LGC<br>Standards                 | 3.48  | 136.060 | 105.100<br>(103.000) | 56  | 19<br>(33) | 20<br>(20) | Tulobuterol    |
| N-Methyl tryptamine                                                                           | Toronto<br>Research<br>Chemicals | 3.58  | 175.105 | 144.000<br>(132.000) | 61  | 17<br>(15) | 8<br>(8)   | Tulobuterol    |
| Ractopamine                                                                                   | Sigma-Aldrich                    | 4.21  | 302.400 | 107.000<br>(91.000)  | 56  | 43<br>(58) | 6<br>(16)  | Tulobuterol    |
| Rizatriptan                                                                                   | Sigma-Adlrch                     | 3.49  | 270.000 | 201.000<br>(158.000) | 55  | 17<br>(28) | 11<br>(11) | Tulobuterol    |
| Tranlycypromin                                                                                | Sigma-Aldrich                    | 3.50  | 134.048 | 117.000<br>(115.000) | 41  | 13<br>(27) | 8<br>(8)   | Tulobuterol    |
| Zolmitriptan                                                                                  | Sigma-Aldrich                    | 3.49  | 288.000 | 243.000<br>(182.000) | 75  | 24<br>(35) | 12<br>(12) | Tulobuterol    |
| Talinolol                                                                                     | Santa-Cruz<br>Biotechnology      | 11.20 | 364.245 | 308.300<br>(100.100) | 85  | 27<br>(33) | 10<br>(8)  | -              |
| Tulobuterol                                                                                   | Santa-Cruz<br>Biotechnology      | 4.69  | 228.125 | 153.900<br>(119.100) | 60  | 23<br>(41) | 10<br>(8)  | -              |
